# Supplementary material
Source: PubMed Central journal article supplement (PMC4321246)
Supplement: pnas.1412514112.sapp.pdf [file pnas.1412514112.sapp.pdf]

1 **Supporting Information for “Reductions in emissions from deforestation from Indonesia’s moratorium on new**  
2 **oil palm, timber, and logging concessions”**

3

4 *Estimation strategy*

5 We placed upper and lower bounds around the treatment effect of a concession designation using two  
6 econometric models, following [1-2]. We placed an upper bound on the treatment effect using a fixed effects  
7 model within a matched area, i.e. a 3-km geographic buffer around all cells in which concessions had been  
8 designated by 2010. This approach assumes that any omitted variables that affect the outcome are time-  
9 invariant. We placed a lower bound on the treatment effect using a pooled regression that included a lagged  
10 dependent variable as a regressor. This approach controls for past cell-level outcomes directly. We estimated  
11 the influence of concessions on deforestation in Stata 13.1 using a Poisson quasi-maximum likelihood estimator  
12 (QMLE) [3-5], which is theoretically consistent with forest cover loss within a 3 km x 3 km grid cell being the  
13 count of many independent, discrete binary observations of forest cover loss or maintenance at the level of 30  
14 m x 30 m remote sensing data. A Poisson QMLE model tolerates zero values, and generates a distribution of  
15 predicted values that fits the distribution of observed data, which is concentrated nearest to zero deforestation  
16 and diminishes toward greater levels of deforestation.

17 Thus our econometric models are:

18 (1)  $y_{it} = \exp(L_{it}' \beta_1 + \beta_2 A_{it} + \gamma_t + \lambda_i + \epsilon_{it})$

19 (2)  $y_{it} = \exp(\beta_0 + \beta_1 y_{it-1} + L_{it}' \beta_2 + \beta_3 A_{it} + X_i' \beta_4 + \gamma_t + \epsilon_{it})$

20

21  $y_{it} = (F_{it}^o - F'_{it})/F_{it}^o$  is fractional deforestation at grid cell  $i$  in year  $t$ , where  $F_{it}^o$  is forest cover at grid cell  
22  $i$  at the start of year  $t$ , and  $F'_{it}$  is forest cover at grid cell  $i$  at the end of year  $t$ .  $L_{it}$  is a matrix of fractional land-use

23 designations at grid cell  $i$  at the start of year  $t$ , including oil palm, timber, and logging concessions, national  
24 parks, and other protected areas.  $A_{it}$  is the time-variant value of potential gross revenue from agriculture per  
25 hectare at grid cell  $i$  in year  $t$ .  $X_i$  is a matrix of time-invariant observable grid cell characteristics, including slope,  
26 elevation, natural logarithm of the distance to the nearest road, and natural logarithm of the distance to the  
27 nearest provincial capital. The term  $\beta_0$  captures unobserved constant determinants of deforestation,  $\lambda_t$   
28 captures unobserved time-invariant cell-specific geographic factors influencing deforestation,  $\gamma_t$  captures  
29 unobserved year-specific factors influencing deforestation such as interest rates or national political conditions.  
30 We excluded cells containing concessions for which license dates were unknown from the regression analyses,  
31 but not from later scenario analyses.

32 We assumed that treatment effects remained constant and were not affected by structural changes  
33 over the decade. Splitting the sample by half-decade in pooled-sample regressions did not show major  
34 differences in coefficients across half-decades, with one exception. The coefficient for logging concessions was  
35 negative and significant between 2000-2004 and positive and significant between 2005-2009 (Table S5).

36

### 37 *Indicative calculation of the effectiveness of the current moratorium*

38 The longer a moratorium policy remains in place, the greater the difference between the area of  
39 concessions on the landscape with and without the policy. Therefore the emission reductions achieved by the  
40 policy compound over time, with larger per-year effects of a moratorium accruing in later years (Figure S4). It  
41 can be shown that under simple arithmetic assumptions, the ratio of percent emission reductions from a shorter  
42 moratorium policy to the percent emission reductions from a longer moratorium policy is proportional to the  
43 relative length of time that the shorter and longer moratorium policies have been in place.

44 The derivation of this property is as follows (variables refer to lengths and areas in Figure S4):

45  $X=cT/2$

46  $Y=(a+b)T/2$

47  $X/Y=c/(a+b)$

48  $x=c(t/T)t/2$

49  $y=(a+b)t/2$

50  $x/y=c(t/T)/(a+b)=(X/Y)(t/T)$

51

52 A ten-year moratorium reduces emissions by 2.5-6.4%. Inversely, emissions would be 2.5-6.8% higher  
53 without a ten-year moratorium than with a ten-year moratorium. Consequently, by applying the property  
54 derived above, a four-year moratorium (e.g. 2011-2015) reduces emissions by about 1.0-2.5%, while emissions  
55 from deforestation would be roughly 1.0-2.7% higher without a four-year moratorium than with a four-year  
56 moratorium. This indicative estimate does not account for strategic considerations by landowners such as pre-  
57 emptive clearing during the grace period.

58

59 **References**

- 60 [1] Guryan J (2004) Desegregation and black dropout rates. *American Economic Review* 94:919-943.
- 61 [2] Angrist JD, Pischke J-S (2009) *Mostly Harmless Econometrics*. Princeton Press, Princeton, NJ.
- 62 [3] Wooldridge JM (2002) *Econometric analysis of cross section and panel data*. MIT Press, Cambridge, MA.
- 63 [4] Busch J, et al. (2012) Structuring economic incentives to reduce emissions from deforestation within  
64 Indonesia. *Proc Nat Acad Sci USA* 109(4):1062-1067.
- 65 [5] Burgess R, et al. (2012) The Political Economy of Deforestation in the Tropics. *Quarterly Journal of Economics*  
66 127 (4): 1707-1754.
- 67 [6] Margono B, et al. (2014). Primary forest cover loss in Indonesia over 2000-2012. *Nature Climate Change*.  
68 4:730-735.
- 69 [7] FAO (2010). *Global forest resources assessment 2010*. Food and Agricultural Organization, Rome, Italy.
- 70 [8] Gunarso P, et al. (2013) Oil palm and land use change in Indonesia, Malaysia and Papua New Guinea.  
71 Roundtable on Sustainable Palm Oil (RSPO). Kuala Lumpur, Malaysia.
- 72 [9] Hansen MC, et al (2010) Quantification of global gross forest cover loss. *Proc Nat Acad Sci USA*. 107:8650-  
73 8655.
- 74 [10] Ministry of Forestry (2008) *Reducing Emissions from Deforestation and Forest Degradation in Indonesia*.  
75 Forestry Research and Development Agency. Jakarta, Indonesia.
- 76 [11] Stibig HJ, et al (2014) Change in tropical forest cover of Southeast Asia from 1990-2010. *Biogeosciences*  
77 11:247-258.
- 78 [12] Ministry of Forestry (2012) *Statistic of Forest Planology 2012*. Directorate General of Forest Planology,  
79 Ministry of Forestry. Jakarta, Indonesia.
- 80 [13] DNPI (2010) *Indonesia's Greenhouse Gas Abatement Cost Curve*. Dewan Nasional Perubahan Iklim, Jakarta,  
81 Indonesia.
- 82 [14] Hansen MC, et al. (2013) High-Resolution Global Maps of 21st-Century Forest Cover Change. *Science* 342-  
83 850-853.
- 84 [15] Abood SA (2014) Relative contributions of the logging, fiber, oil palm, and mining industries to forest loss in  
85 Indonesia. *Conservation Letters*. doi: 10.1111/conl.12103
- 86 [16] FAO (2005) *Global forest resources assessment 2005*. Food and Agricultural Organization, Rome, Italy.
- 87 [17] WRI (2014) *Climate Analysis Indicators Tool v2.0*. World Resources Institute. Washington, DC.  
88 <http://cait2.wri.org/wri>
- 89 [18] Harris N, et al (2012) Baseline map of carbon emissions from deforestation in tropical regions. *Science*  
90 336:1573-1576.

91 Table S1. Effect of land-use designation and potential agricultural revenue on deforestation. Year=2000 omitted in panel regressions.

| Description                                         | Decadal cross section; land-use designation in 2000, Poisson |         | Annual panel; pooled; Poisson |         | Annual panel; pooled; lagged dependent variable as regressor; Poisson |          | Annual panel; fixed effects; Poisson |           |
|-----------------------------------------------------|--------------------------------------------------------------|---------|-------------------------------|---------|-----------------------------------------------------------------------|----------|--------------------------------------|-----------|
| Unit of observation                                 | grid cell                                                    |         | grid cell-year                |         | grid cell-year                                                        |          | grid cell-year                       |           |
| Dependent variable                                  | deforestation rate (%)                                       |         | deforestation rate (%)        |         | deforestation rate (%)                                                |          | deforestation rate (%)               |           |
| n                                                   | 195,249                                                      |         | 1,903,797                     |         | 1,903,797                                                             |          | 1,698,996                            |           |
| Independent variable                                | Coefficient                                                  | z value | Coefficient                   | z value | Coefficient                                                           | z value  | Coefficient                          | z value   |
| Oil palm concession                                 | 0.8943                                                       | 76.11   | 1.2625                        | 58.35   | 0.8177                                                                | 29.67    | 0.3015                               | 2.09      |
| Timber concession                                   | 0.7253                                                       | 41.47   | 1.1434                        | 102.28  | 0.8286                                                                | 60.23    | 0.4368                               | 7.24      |
| Logging concession                                  | 0.0203                                                       | 0.70    | 0.0940                        | 4.56    | 0.1049                                                                | 5.62     | 0.0183                               | 0.15      |
| National park                                       | -1.1024                                                      | -20.43  | -1.2448                       | -32.37  | -1.1656                                                               | -30.59   | -1.1031                              | -3.83     |
| Other protected area                                | -0.8670                                                      | -23.46  | -2.0219                       | -66.07  | -1.9041                                                               | -63.39   | -0.5755                              | -0.57     |
| Slope                                               | -0.0614                                                      | -45.91  | -0.0677                       | -73.36  | -0.0582                                                               | -63.33   |                                      |           |
| Elevation (m)                                       | -0.0012                                                      | -39.55  | -0.0015                       | -67.07  | -0.0015                                                               | -65.54   |                                      |           |
| Log distance to road (km)                           | -0.0739                                                      | -33.33  | -0.0567                       | -35.66  | -0.0698                                                               | -41.94   |                                      |           |
| Log distance to capital (km)                        | -0.2272                                                      | -49.80  | -0.2266                       | -72.78  | -0.1984                                                               | -58.78   |                                      |           |
| Potential agricultural revenue (\$/ha/yr; 2005 USD) |                                                              |         |                               |         |                                                                       |          | 0.000101                             | 3.50      |
| Year=2000                                           | 0.000156                                                     | 12.44   | 0.000154                      | 23.38   | 0.000117                                                              | 17.47    | (omitted)                            | (omitted) |
| Year=2001                                           |                                                              |         | 0.1179                        | 8.44    | 4.5346                                                                | 0.0337   | 0.1119                               | 2.56      |
| Year=2002                                           |                                                              |         | -0.4232                       | -25.10  | 4.0179                                                                | 0.035155 | -0.3970                              | -7.85     |
| Year=2003                                           |                                                              |         | 0.4758                        | 32.64   | 4.9406                                                                | 3.41E-02 | 0.5077                               | 12.04     |
| Year=2004                                           |                                                              |         | 0.4068                        | 26.78   | 4.7705                                                                | 0.0338   | 0.4473                               | 10.41     |
| Year=2005                                           |                                                              |         | 0.6539                        | 45.77   | 5.0167                                                                | 3.36E-02 | 0.6895                               | 17.17     |
| Year=2006                                           |                                                              |         | 0.5027                        | 29.57   | 4.8634                                                                | 0.034398 | 0.5934                               | 10.49     |
| Year=2007                                           |                                                              |         | 0.4054                        | 19.80   | 4.7834                                                                | 0.036312 | 0.5437                               | 7.17      |
| Year=2008                                           |                                                              |         | 0.6618                        | 28.67   | 5.0623                                                                | 0.03855  | 0.8357                               | 9.01      |
| Year=2009                                           |                                                              |         | 0.3497                        | 16.04   | 4.6625                                                                | 0.036591 | 0.5173                               | 6.12      |
| Intercept                                           | -1.1949                                                      | -32.47  |                               |         | -8.1727                                                               | -218.22  |                                      |           |
|                                                     |                                                              |         | -3.6383                       | -191.41 |                                                                       |          |                                      |           |

92

93

94 Table S2. Results of geographically matched fixed effects models

|                      | Fixed effects,<br>6 km buffer |       | Fixed effects,<br>3 km buffer |       | Fixed effects,<br>own cell only |       | Fixed effects, 3 km<br>buffer with spatial lag |       |
|----------------------|-------------------------------|-------|-------------------------------|-------|---------------------------------|-------|------------------------------------------------|-------|
| Oil palm concession  | 0.1786                        | 1.23  | 0.1579                        | 1.08  | 0.1169                          | 0.80  | 0.1056                                         | 0.69  |
| Timber concession    | 0.3599                        | 5.65  | 0.3656                        | 5.63  | 0.3814                          | 5.65  | 0.2172                                         | 3.10  |
| Logging concession   | 0.0134                        | 0.11  | 0.0302                        | 0.23  | 0.0540                          | 0.40  | -0.0053                                        | -0.04 |
| National park        | -0.7119                       | -2.26 | -0.6553                       | -2.02 | -0.5872                         | -1.70 | -0.2730                                        | -0.76 |
| Other protected area | 0.0273                        | 0.03  | 0.1075                        | 0.10  | (no result)                     |       | 0.0968                                         | 0.09  |

95

96 Table S3. Effect of land use designation on deforestation, disaggregated by forest cover quartile

| Description                             |                       | Pooled; lagged dependent variable as regressor; Poisson |          | Fixed effects; Poisson |         |
|-----------------------------------------|-----------------------|---------------------------------------------------------|----------|------------------------|---------|
| Unit of observation                     |                       | grid cell                                               |          | grid cell              |         |
| Dependent variable                      |                       | deforestation rate (%)                                  |          | deforestation rate (%) |         |
| n                                       |                       | 1,903,797                                               |          | 1,698,996              |         |
| Driver                                  | Forest cover quartile | Coefficient                                             | z value  | Coefficient            | z value |
| Oil palm concession (%)                 | Highest               | 2.9794                                                  | 5.43     | -0.3146                | -0.23   |
|                                         | High                  | 0.9220                                                  | 6.88     | -0.2821                | -0.77   |
|                                         | Low                   | 0.6956                                                  | 14.84    | 0.5277                 | 2.76    |
|                                         | Lowest                | 0.6103                                                  | 20.92    | 0.2678                 | 1.84    |
| Timber concession (%)                   | Highest               | 2.0072                                                  | 8.72     | 1.3707                 | 2.92    |
|                                         | High                  | 1.1332                                                  | 19.78    | 0.8023                 | 5.55    |
|                                         | Low                   | 0.7347                                                  | 36.29    | 0.6900                 | 8.17    |
|                                         | Lowest                | 0.7026                                                  | 42.1     | 0.2795                 | 4.39    |
| Logging concession (%)                  | Highest               | 0.7613                                                  | 9.54     | 1.0590                 | 2.12    |
|                                         | High                  | 0.1781                                                  | 3.78     | 0.0547                 | 0.30    |
|                                         | Low                   | -0.0017                                                 | -0.07    | -0.4221                | -3.01   |
|                                         | Lowest                | 0.4568                                                  | 15.96    | -0.1189                | -0.89   |
| National park (%)                       | Highest               | -0.8805                                                 | -3.87    | 1.4810                 | 1.41    |
|                                         | High                  | -0.4580                                                 | -4.82    | 0.3720                 | 0.82    |
|                                         | Low                   | -0.8022                                                 | -13.91   | -0.7172                | -1.84   |
|                                         | Lowest                | -1.2157                                                 | -18.43   | -2.0812                | -6.00   |
| Other protected area (%)                | Highest               | -0.4369                                                 | -5.53    | 1.9237                 | 1.01    |
|                                         | High                  | -0.3987                                                 | -10.59   | 1.2338                 | 0.82    |
|                                         | Low                   | -1.5613                                                 | -33.18   | -0.0988                | -0.08   |
|                                         | Lowest                | -3.0301                                                 | -35.71   | -0.9633                | -0.80   |
| Slope (degree)                          | Highest               | -0.0548                                                 | -6.71    |                        |         |
|                                         | High                  | -0.0775                                                 | -31.95   |                        |         |
|                                         | Low                   | -0.0530                                                 | -43.55   |                        |         |
|                                         | Lowest                | -0.0277                                                 | -19.65   |                        |         |
| Elevation (m)                           | Highest               | -0.0018                                                 | -8.77    |                        |         |
|                                         | High                  | -0.0006                                                 | -13.99   |                        |         |
|                                         | Low                   | -0.0008                                                 | -31.45   |                        |         |
|                                         | Lowest                | -0.0013                                                 | -43.77   |                        |         |
| Log distance from road (km)             | Highest               | -0.3260                                                 | -13.06   |                        |         |
|                                         | High                  | -0.1924                                                 | -26.61   |                        |         |
|                                         | Low                   | -0.0550                                                 | -20.33   |                        |         |
|                                         | Lowest                | 0.0627                                                  | 27.46    |                        |         |
| Log distance from capital (km)          | Highest               | -0.5224                                                 | -12.4300 |                        |         |
|                                         | High                  | -0.5446                                                 | -41.1300 |                        |         |
|                                         | Low                   | -0.2690                                                 | -48.3400 |                        |         |
|                                         | Lowest                | 0.0042                                                  | 0.9000   |                        |         |
| Maximum agricultural revenue (\$/ha/yr) | Highest               | -0.000088                                               | -1.66    | 0.0006861              | 4.73    |
|                                         | High                  | -0.000047                                               | -3.15    | 0.0004644              | 9.60    |
|                                         | Low                   | 0.000116                                                | 14.94    | 0.0003246              | 10.00   |

|                                |         |           |         |           |        |
|--------------------------------|---------|-----------|---------|-----------|--------|
|                                | Lowest  | 0.000241  | 34.71   | 0.0000487 | 1.67   |
| Forest cover quartile<br>(0/1) | Highest | 1.8667    | 5.76    | -2.4690   | -8.33  |
|                                | High    | 3.1336    | 38.74   | -1.3982   | -14.9  |
|                                | Low     | 1.8339    | 49.83   | -0.7887   | -14.95 |
|                                | Lowest  | (omitted) |         | (omitted) |        |
| Year = 2000                    |         | (omitted) |         | (omitted) |        |
| Year = 2001                    |         | 4.1579    | 108.92  | 0.0918    | 2.09   |
| Year = 2002                    |         | 3.5968    | 91.46   | -0.5249   | -10.32 |
| Year = 2003                    |         | 4.5039    | 116.96  | 0.3504    | 8.20   |
| Year = 2004                    |         | 4.3252    | 113.05  | 0.2535    | 5.78   |
| Year = 2005                    |         | 4.5686    | 120.61  | 0.4782    | 11.49  |
| Year = 2006                    |         | 4.3351    | 111.58  | 0.3189    | 5.49   |
| Year = 2007                    |         | 4.1843    | 102.60  | 0.2464    | 3.18   |
| Year = 2008                    |         | 4.3924    | 102.34  | 0.5460    | 5.80   |
| Year = 2009                    |         | 4.0085    | 97.35   | 0.2641    | 3.07   |
| Intercept                      |         | -9.0887   | -209.03 |           |        |

97



98 Table S4. Effect of land use designation on deforestation, disaggregated by region

| Description                 |                             | Pooled; lagged dependent variable as regressor; Poisson |                  | Fixed effects; Poisson |                |
|-----------------------------|-----------------------------|---------------------------------------------------------|------------------|------------------------|----------------|
| Unit of observation         |                             | grid cell                                               |                  | grid cell              |                |
| Dependent variable          |                             | deforestation rate (%)                                  |                  | deforestation rate (%) |                |
| n                           |                             | 1,903,797                                               |                  | 1,698,996              |                |
| Driver                      | Region                      | Coefficient                                             | z value          | Coefficient            | z value        |
| Oil palm concession (%)     | Java-Bali                   |                                                         |                  |                        |                |
|                             | Sumatra                     | 0.4347                                                  | 11.78            | 1.6996                 | 0.37           |
|                             | Kalimantan                  | 1.1965                                                  | 45.13            | 0.1947                 | 1.34           |
|                             | Sulawesi<br>Eastern islands |                                                         |                  |                        |                |
| Timber concession (%)       | Java-Bali                   |                                                         |                  |                        |                |
|                             | Sumatra                     | 0.9960                                                  | 71.97            | 0.5311                 | 7.75           |
|                             | Kalimantan                  | 0.1995                                                  | 9.67             | -0.1480                | -1.05          |
|                             | Sulawesi<br>Eastern islands | 0.5023<br>-1.0193                                       | 8.86<br>-12.08   | 0.0116<br>0.7303       | 0.01<br>0.30   |
| Logging concession (%)      | Java-Bali                   |                                                         |                  |                        |                |
|                             | Sumatra                     | -0.0214                                                 | -0.36            | 0.0268                 | 0.07           |
|                             | Kalimantan                  | 0.1054                                                  | 4.14             | 0.0441                 | 0.31           |
|                             | Sulawesi<br>Eastern islands | 0.6501<br>0.8550                                        | 16.59<br>16.89   | -0.6171<br>-0.1752     | -1.29<br>-0.30 |
| National park (%)           | Java-Bali                   |                                                         |                  | 0.0463                 | 0.01           |
|                             |                             | -1.0346                                                 | -16.75           |                        |                |
|                             | Sumatra                     |                                                         |                  |                        |                |
|                             | Kalimantan                  | -1.2840                                                 | -22.70           | -1.1605                | -3.82          |
|                             | Sulawesi<br>Eastern islands | 0.1675<br>-0.8024                                       | 3.05<br>-22.29   | -0.4563<br>-0.9793     | -0.10<br>-1.03 |
| Other protected area (%)    | Java-Bali                   | -0.0024                                                 | 0.00             | -11.2574               | -0.12          |
|                             | Sumatra                     |                                                         |                  |                        |                |
|                             | Kalimantan                  | -0.6206                                                 | -7.50            | -0.6751                | -0.66          |
|                             | Sulawesi<br>Eastern islands | -1.3826<br>-0.4404                                      | -14.54<br>-13.60 |                        |                |
| Slope (degree)              | Java-Bali                   | -0.0086                                                 | -2.58            |                        |                |
|                             | Sumatra                     | -0.0744                                                 | -51.64           |                        |                |
|                             | Kalimantan                  | -0.0208                                                 | -6.67            |                        |                |
|                             | Sulawesi                    | -0.0392                                                 | -25.01           |                        |                |
|                             | Eastern islands             | -0.0126                                                 | -8.11            |                        |                |
| Elevation (m)               | Java-Bali                   | -0.0005                                                 | -11.63           |                        |                |
|                             | Sumatra                     | -0.0011                                                 | -39.83           |                        |                |
|                             | Kalimantan                  | -0.0066                                                 | -50.08           |                        |                |
|                             | Sulawesi                    | -0.0013                                                 | -38.52           |                        |                |
|                             | Eastern islands             | -0.0002                                                 | -11.35           |                        |                |
| Log distance from road (km) | Java-Bali                   | 0.2323                                                  | 13.94            |                        |                |
|                             | Sumatra                     | 0.0112                                                  | 4.36             |                        |                |
|                             | Kalimantan                  | 0.0352                                                  | 9.70             |                        |                |

|                                         |                 |           |        |           |       |
|-----------------------------------------|-----------------|-----------|--------|-----------|-------|
|                                         | Sulawesi        | 0.0840    | 18.00  |           |       |
|                                         | Eastern islands | -0.1385   | -20.92 |           |       |
| Log distance from capital (km)          | Java-Bali       | 0.2267    | 5.96   |           |       |
|                                         | Sumatra         | 0.0156    | 2.60   |           |       |
|                                         | Kalimantan      | 0.1438    | 20.14  |           |       |
|                                         | Sulawesi        | 0.1541    | 16.24  |           |       |
|                                         | Eastern islands | -0.1871   | -13.63 |           |       |
| Maximum agricultural revenue (\$/ha/yr) | Java-Bali       | -0.000323 | -20.11 | -0.000261 | -3.94 |
|                                         | Sumatra         | 0.000034  | 4.86   | 0.000086  | 2.95  |
|                                         | Kalimantan      | 0.000063  | 8.35   | 0.000125  | 3.75  |
|                                         | Sulawesi        | -0.000161 | -19.06 | -0.000135 | -3.07 |
|                                         | Eastern islands | -0.000235 | -19.78 | -0.000163 | -3.15 |
| Region (0/1)                            | Java-Bali       | -1.9964   | -10.25 |           |       |
|                                         | Sumatra         | 0.5810    | 7.41   |           |       |
|                                         | Kalimantan      | -0.3644   | -4.54  |           |       |
|                                         | Sulawesi        | -0.4744   | -5.38  |           |       |
|                                         | Eastern islands | (omitted) |        | (omitted) |       |
| Year = 2000                             |                 | (omitted) |        | (omitted) |       |
| Year = 2001                             |                 | 0.0961    | 6.96   | 0.1072    | 2.45  |
| Year = 2002                             |                 | -0.3608   | -21.79 | -0.3800   | -7.49 |
| Year = 2003                             |                 | 0.5494    | 38.56  | 0.5265    | 12.41 |
| Year = 2004                             |                 | 0.4801    | 32.15  | 0.4684    | 10.83 |
| Year = 2005                             |                 | 0.7100    | 51.03  | 0.7076    | 17.53 |
| Year = 2006                             |                 | 0.6975    | 42.54  | 0.6427    | 11.11 |
| Year = 2007                             |                 | 0.7059    | 35.82  | 0.6109    | 7.83  |
| Year = 2008                             |                 | 1.0478    | 47.28  | 0.9158    | 9.57  |
| Year = 2009                             |                 | 0.7002    | 33.01  | 0.5951    | 6.82  |
| Intercept                               |                 | -4.8843   | -67.35 |           |       |

99

100

101 Table S5. Models with spatial lag included as a method of addressing potential spatial correlation; effects by half-decade.

| Description                                         | Annual panel; pooled; lagged dependent variable as regressor; spatial lag as regressor; Poisson |         | Annual panel; fixed effects; spatial lag as regressor; Poisson |         | Annual panel; pooled; Poisson, 2000-2004 |         | Annual panel; pooled; Poisson, 2005-2009 |         |
|-----------------------------------------------------|-------------------------------------------------------------------------------------------------|---------|----------------------------------------------------------------|---------|------------------------------------------|---------|------------------------------------------|---------|
| Unit of observation                                 | grid cell-year                                                                                  |         | grid cell-year                                                 |         | grid cell-year                           |         | grid cell-year                           |         |
| Dependent variable                                  | deforestation rate (%)                                                                          |         | deforestation rate (%)                                         |         | deforestation rate (%)                   |         | deforestation rate (%)                   |         |
| n                                                   | 1,863,317                                                                                       |         | 1,661,196                                                      |         | 951,906                                  |         | 951,891                                  |         |
| Independent variable                                | Coefficient                                                                                     | z value | Coefficient                                                    | z value | Coefficient                              | z value | Coefficient                              | z value |
| Oil palm concession                                 | 0.5220                                                                                          | 11.02   | 0.1923                                                         | 1.25    | 1.3879                                   | 36.76   | 1.2059                                   | 45.35   |
| Timber concession                                   | 0.6392                                                                                          | 35.77   | 0.2553                                                         | 3.90    | 0.9543                                   | 46.45   | 1.1918                                   | 89.62   |
| Logging concession                                  | 0.1345                                                                                          | 6.93    | -0.0191                                                        | -0.15   | -0.1431                                  | -5.54   | 0.1943                                   | 7.40    |
| National park                                       | -1.0831                                                                                         | -29.44  | -0.8005                                                        | -2.69   | -1.1752                                  | -26.11  | -1.2796                                  | -24.02  |
| Other protected area                                | -1.8010                                                                                         | -59.78  | -0.4368                                                        | -0.43   | -1.7625                                  | -36.95  | -2.2024                                  | -56.33  |
| Slope                                               |                                                                                                 |         |                                                                |         |                                          |         |                                          |         |
|                                                     | -0.0522                                                                                         | -54.47  |                                                                |         | -0.0504                                  | -42.10  | -0.0787                                  | -58.76  |
| Elevation (m)                                       | -0.0014                                                                                         | -62.07  |                                                                |         | -0.0014                                  | -48.90  | -0.0016                                  | -48.33  |
| Log distance to road (km)                           | -0.0787                                                                                         | -41.81  |                                                                |         | -0.0580                                  | -24.39  | -0.0573                                  | -27.38  |
| Log distance to capital (km)                        | -0.1887                                                                                         | -44.15  |                                                                |         | -0.2065                                  | -43.93  | -0.2355                                  | -57.95  |
| Potential agricultural revenue (\$/ha/yr; 2005 USD) | 0.000078                                                                                        | 10.90   | 0.000060                                                       | 2.01    | 0.000318                                 | 28.27   | 0.000130                                 | 31.59   |
| Year=2000                                           | (omitted)                                                                                       |         | (omitted)                                                      |         | (omitted)                                |         | (omitted)                                |         |
| Year=2001                                           | 2.6064                                                                                          | 47.22   | 0.0974                                                         | 2.19    |                                          |         |                                          |         |
| Year=2002                                           | 2.1445                                                                                          | 38.41   | -0.3495                                                        | -6.79   |                                          |         |                                          |         |
| Year=2003                                           | 2.9647                                                                                          | 53.82   | 0.4247                                                         | 9.84    |                                          |         |                                          |         |
| Year=2004                                           | 2.7988                                                                                          | 49.26   | 0.3499                                                         | 7.95    |                                          |         |                                          |         |
| Year=2005                                           | 3.0243                                                                                          | 55.89   | 0.5416                                                         | 13.13   |                                          |         |                                          |         |
| Year=2006                                           | 2.9035                                                                                          | 51.85   | 0.4948                                                         | 8.49    |                                          |         |                                          |         |
| Year=2007                                           | 2.8782                                                                                          | 51.18   | 0.4827                                                         | 6.18    |                                          |         |                                          |         |
| Year=2008                                           | 3.1173                                                                                          | 54.01   | 0.7141                                                         | 7.45    |                                          |         |                                          |         |
| Year=2009                                           | 2.7956                                                                                          | 50.91   | 0.4537                                                         | 5.20    |                                          |         |                                          |         |
| Lagged dependent variable                           | 2.5419                                                                                          | 47.10   |                                                                |         |                                          |         |                                          |         |
| Spatial lag                                         | 4.1662                                                                                          | 134.83  | 3.7399                                                         | 62.83   |                                          |         |                                          |         |
| Intercept                                           | -6.2610                                                                                         |         |                                                                |         |                                          |         |                                          |         |
|                                                     |                                                                                                 | -103.67 |                                                                |         | -3.9009                                  | -141.36 | -2.9578                                  | -132.87 |

102

103

104 Table S6. Geographic characteristics by land-use designations. Mean (standard deviation)

|                                                   | All 3 km<br>x 3 km<br>cells | Cells with oil<br>palm concession<br>by 2010 | Cells with timber<br>concession<br>by 2010 | Cells with logging<br>concession<br>by 2010 | Cells with national park<br>by 2010 | Cells with other<br>protected area<br>by 2010 | Cells with no<br>concession or<br>protected area<br>by 2010 |
|---------------------------------------------------|-----------------------------|----------------------------------------------|--------------------------------------------|---------------------------------------------|-------------------------------------|-----------------------------------------------|-------------------------------------------------------------|
| n                                                 | 195,466                     | 22,631                                       | 17,012                                     | 21,352                                      | 14,932                              | 10,392                                        | 117,257                                                     |
| Forest cover as % of cell, 2000                   | 85.2<br>(24.8)              | 87.5<br>(17.3)                               | 89.3<br>(16.7)                             | 97.0<br>(7.9)                               | 93.9<br>(5.5)                       | 89.8<br>(19.6)                                | 81.0<br>(28.4)                                              |
| Forest cover as % of cell, 2010                   | 78.7<br>(27.4)              | 68.0<br>(25.9)                               | 70.3<br>(26.6)                             | 91.2<br>(14.8)                              | 91.8<br>(17.2)                      | 87.7<br>(20.7)                                | 77.0<br>(29.2)                                              |
| Deforestation as % of cell, 2000-<br>2010         | 6.5<br>(13.8)               | 19.5<br>(22.1)                               | 19.1<br>(22.7)                             | 5.8<br>(11.6)                               | 2.1<br>(7.1)                        | 2.1<br>(5.8)                                  | 4.0<br>(9.3)                                                |
| Palm oil cover as % of cell, 2010                 | 3.1<br>(14.0)               | 13.1<br>(27.3)                               | 3.7<br>(14.2)                              | 0.7<br>(6.3)                                | 0.1<br>(2.6)                        | 0.5<br>(5.4)                                  | 2.3<br>(11.8)                                               |
| Slope (%)                                         | 7.5<br>(7.2)                | 2.9<br>(2.7)                                 | 3.7<br>(3.8)                               | 6.9<br>(5.4)                                | 12.3<br>(8.3)                       | 11.7<br>(8.8)                                 | 7.8<br>(7.3)                                                |
| Elevation (m)                                     | 359<br>(550)                | 60<br>(78)                                   | 116<br>(218)                               | 210<br>(239)                                | 801<br>(842)                        | 631<br>(691)                                  | 382<br>(546)                                                |
| Distance to nearest highway (km)                  | 63<br>(88)                  | 34<br>(40)                                   | 31<br>(35)                                 | 81<br>(85)                                  | 84<br>(110)                         | 102<br>(104)                                  | 63<br>(91)                                                  |
| Distance to nearest provincial<br>capital (km)    | 230<br>(171)                | 170<br>(102)                                 | 169<br>(124)                               | 279<br>(162)                                | 255<br>(167)                        | 326<br>(233)                                  | 227<br>(172)                                                |
| Potential agricultural revenue<br>(\$/ha/yr)      | 2506<br>(361)               | 2532<br>(291)                                | 2554<br>(340)                              | 2532<br>(309)                               | 2530<br>(317)                       | 2501<br>(323)                                 | 2490<br>(389)                                               |
| Average above and below ground<br>biomass (tC/ha) | 150<br>(69)                 | 128<br>(64)                                  | 140<br>(65)                                | 189<br>(53)                                 | 169<br>(258)                        | 162<br>(60)                                   | 145<br>(70)                                                 |
| Peat land extent as % of cell                     | 20<br>(91)                  | 36<br>(111)                                  | 65<br>(168)                                | 13<br>(81)                                  | 29<br>(120)                         | 4.7<br>(24.6)                                 | 13<br>(68)                                                  |

105

106

107 Table S7. Sensitivity of econometric results to alternative forest cover thresholds (pooled; lagged dependent variable as regressor)

| Forest cover threshold                              | 50%                                                                         |         | 75%                                                                         |         | 90%                                                                         |         | Primary only<br>[6]                                                         |         |
|-----------------------------------------------------|-----------------------------------------------------------------------------|---------|-----------------------------------------------------------------------------|---------|-----------------------------------------------------------------------------|---------|-----------------------------------------------------------------------------|---------|
| Description                                         | Annual panel; pooled;<br>lagged dependent variable<br>as regressor; Poisson |         | Annual panel; pooled;<br>lagged dependent variable<br>as regressor; Poisson |         | Annual panel; pooled; lagged<br>dependent variable as<br>regressor; Poisson |         | Annual panel; pooled; lagged<br>dependent variable as regressor;<br>Poisson |         |
| Unit of observation                                 | grid cell-year                                                              |         | grid cell-year                                                              |         | grid cell-year                                                              |         | grid cell-year                                                              |         |
| Dependent variable                                  | deforestation rate (%)                                                      |         |
| n                                                   | 1,903,818                                                                   |         | 1,903,820                                                                   |         | 1,903,820                                                                   |         | 1,102,784                                                                   |         |
| Independent variable                                | Coefficient                                                                 | z value |
| Oil palm concession                                 | 0.8206                                                                      | 29.84   | 0.8213                                                                      | 29.89   | 0.8213                                                                      | 29.89   | 0.8671                                                                      | 24.49   |
| Timber concession                                   | 0.8306                                                                      | 60.39   | 0.8312                                                                      | 60.43   | 0.8312                                                                      | 60.43   | 1.0458                                                                      | 54.47   |
| Logging concession                                  | 0.1047                                                                      | 5.62    | 0.1049                                                                      | 5.62    | 0.1049                                                                      | 5.62    | 0.0454                                                                      | 1.14    |
| National park                                       | -1.1660                                                                     | -30.60  | -1.1659                                                                     | -30.6   | -1.1659                                                                     | -30.60  | -1.5679                                                                     | -20.81  |
| Other protected area                                | -1.9052                                                                     | -63.41  | -1.9052                                                                     | -63.41  | -1.9052                                                                     | -63.41  | -2.0568                                                                     | -32.44  |
| Slope                                               | -0.0582                                                                     | -63.36  | -0.0582                                                                     | -63.36  | -0.0582                                                                     | -63.36  | -0.0607                                                                     | -46.96  |
| Elevation (m)                                       | -0.0015                                                                     | -65.54  | -0.0015                                                                     | -65.54  | -0.0015                                                                     | -65.54  | -0.0018                                                                     | -60.07  |
| Log distance to road (km)                           | -0.0695                                                                     | -41.62  | -0.0695                                                                     | -41.62  | -0.0695                                                                     | -41.62  | -0.0789                                                                     | -33.56  |
| Log distance to capital (km)                        | -0.1980                                                                     | -58.58  | -0.1981                                                                     | -58.61  | -0.1981                                                                     | -58.61  | -0.1327                                                                     | -31.38  |
| Potential agricultural revenue (\$/ha/yr; 2005 USD) | 0.000117                                                                    | 17.47   | 0.000117                                                                    | 17.47   | 0.000117                                                                    | 17.47   | 0.000127                                                                    | 13.19   |
| Year=2000                                           | (omitted)                                                                   |         | (omitted)                                                                   |         | (omitted)                                                                   |         | (omitted)                                                                   |         |
| Year=2001                                           | 4.5234                                                                      | 133.41  | 4.5209                                                                      | 133.27  | 4.5209                                                                      | 133.27  | 4.3832                                                                      | 62.42   |
| Year=2002                                           | 4.0079                                                                      | 113.66  | 4.0054                                                                      | 113.53  | 4.005403                                                                    | 113.53  | 3.7113                                                                      | 51.95   |
| Year=2003                                           | 4.9305                                                                      | 144.02  | 4.9280                                                                      | 143.87  | 4.9280                                                                      | 143.87  | 4.8226                                                                      | 68.04   |
| Year=2004                                           | 4.7609                                                                      | 140.42  | 4.7586                                                                      | 140.29  | 4.7586                                                                      | 140.29  | 4.5050                                                                      | 64.73   |
| Year=2005                                           | 5.0064                                                                      | 148.65  | 5.0041                                                                      | 148.51  | 5.0041                                                                      | 148.51  | 4.9407                                                                      | 70.72   |
| Year=2006                                           | 4.8531                                                                      | 140.50  | 4.8508                                                                      | 140.37  | 4.8508                                                                      | 140.37  | 4.6671                                                                      | 67.16   |
| Year=2007                                           | 4.7731                                                                      | 130.96  | 4.7709                                                                      | 130.85  | 4.7709                                                                      | 130.85  | 4.6122                                                                      | 64.09   |
| Year=2008                                           | 5.0531                                                                      | 130.90  | 5.0504                                                                      | 130.74  | 5.0504                                                                      | 130.74  | 4.9043                                                                      | 65.06   |
| Year=2009                                           | 4.6536                                                                      | 126.95  | 4.6515                                                                      | 126.84  | 4.6515                                                                      | 126.84  | 4.4705                                                                      | 62.54   |
| Intercept                                           | -8.1648                                                                     | -217.89 | -8.1620                                                                     | -217.66 | -8.1620                                                                     | -217.66 | -8.6101                                                                     | -115.88 |

108

109

110 Table S8. Sensitivity of econometric results to alternative forest cover thresholds (fixed effects)

111

| Forest cover threshold                              | 50%                                  |         | 75%                                  |         | 90%                                  |         | Primary only [6]                     |         |
|-----------------------------------------------------|--------------------------------------|---------|--------------------------------------|---------|--------------------------------------|---------|--------------------------------------|---------|
| Description                                         | Annual panel; fixed effects; Poisson |         |
| Unit of observation                                 | grid cell-year                       |         | grid cell-year                       |         | grid cell-year                       |         | grid cell-year                       |         |
| Dependent variable                                  | deforestation rate (%)               |         |
| n                                                   | 1,699,018                            |         | 1,699,020                            |         | 1,699,020                            |         | 847,797                              |         |
| Independent variable                                | Coefficient                          | z value |
| Oil palm concession                                 |                                      |         |                                      |         |                                      |         |                                      |         |
| Timber concession                                   | 0.3023                               | 2.10    | 0.3023                               | 2.1     | 0.3023                               | 2.10    | 0.0436                               | 0.17    |
| Logging concession                                  | 0.4375                               | 7.25    | 0.4376                               | 7.25    | 0.4376                               | 7.25    | 0.8220                               | 6.77    |
| National park                                       | 0.0189                               | 0.15    | 0.0190                               | 0.15    | 0.0190                               | 0.15    | 0.3325                               | 0.76    |
| Other protected area                                | -1.1024                              | -3.83   | -1.1023                              | -3.83   | -1.1023                              | -3.83   | 2.6084                               | 0.99    |
| Potential agricultural revenue (\$/ha/yr; 2005 USD) | -0.5746                              | -0.57   | -0.5745                              | -0.57   | -0.5745                              | -0.57   | -0.5916                              | -0.57   |
| Year=2000                                           | 0.000101                             | 3.48    | 0.000101                             | 3.48    | 0.000101                             | 3.48    | 0.000064                             | 1.46    |
| Year=2001                                           | (omitted)                            |         | (omitted)                            |         | (omitted)                            |         | (omitted)                            |         |
| Year=2002                                           | 0.1108                               | 2.53    | 0.1108                               | 2.53    | 0.1108                               | 2.53    | 0.2149                               | 3.51    |
| Year=2003                                           | -0.3978                              | -7.87   | -0.3978                              | -7.87   | -0.3978                              | -7.87   | -0.3896                              | -5.04   |
| Year=2004                                           | 0.5069                               | 12.03   | 0.5069                               | 12.03   | 0.5069                               | 12.03   | 0.7199                               | 11.44   |
| Year=2005                                           | 0.446548                             | 10.39   | 0.4466                               | 10.4    | 0.4466                               | 10.40   | 0.4914                               | 7.35    |
| Year=2006                                           | 0.6884                               | 17.14   | 0.6884                               | 17.15   | 0.6884                               | 17.15   | 0.8918                               | 14.56   |
| Year=2007                                           | 0.5926                               | 10.48   | 0.5927                               | 10.48   | 0.5927                               | 10.48   | 0.7785                               | 9.04    |
| Year=2008                                           | 0.5431                               | 7.16    | 0.5432                               | 7.16    | 0.5432                               | 7.16    | 0.7881                               | 6.87    |
| Year=2009                                           | 0.8354                               | 9.01    | 0.8354                               | 9.01    | 0.8354                               | 9.01    | 1.0966                               | 7.83    |
|                                                     | 0.5168                               | 6.12    | 0.5168                               | 6.12    | 0.5168                               | 6.12    | 0.6647                               | 5.18    |

112

113

114 Table S9. Crops with highest potential agricultural revenue in greatest percent of cell-years, 2000-2009

| Crop (n=21) | % of cell-years |
|-------------|-----------------|
| Palm oil    | 69.0            |
| Sugar cane  | 11.6            |
| Banana      | 5.6             |
| Cotton      | 5.3             |
| Cocoa       | 4.0             |
| Tea         | 1.9             |
| Rice        | 1.0             |
| Coffee      | 1.0             |
| Other crop  | 0.7             |

115

116

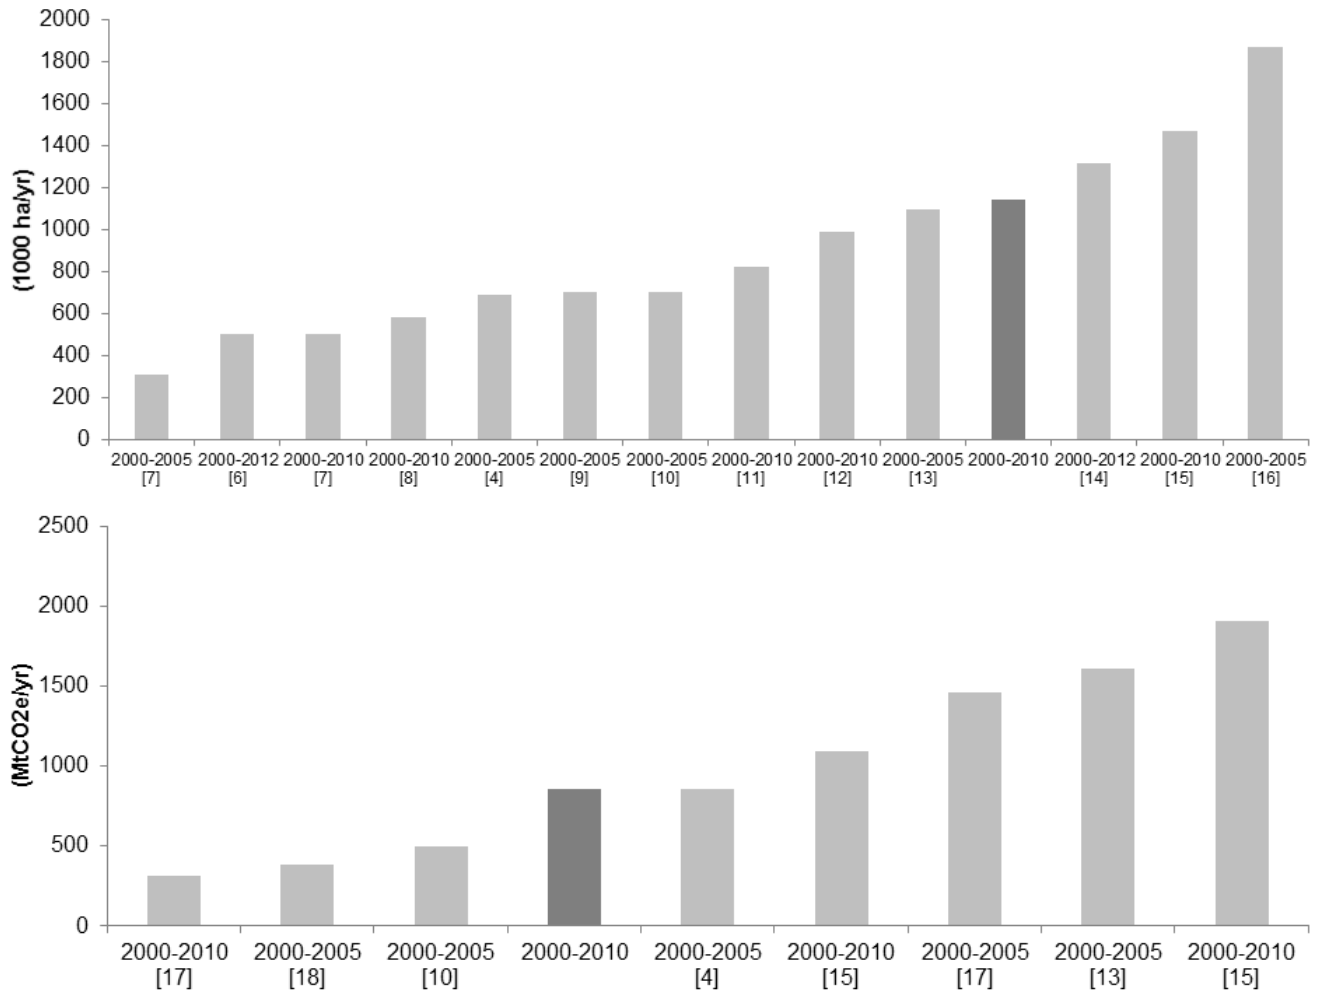

117

118 Figure S1. Estimated average annual deforestation and emissions from deforestation across Indonesia, by  
 119 source. Shaded columns represent estimates from this paper.

120



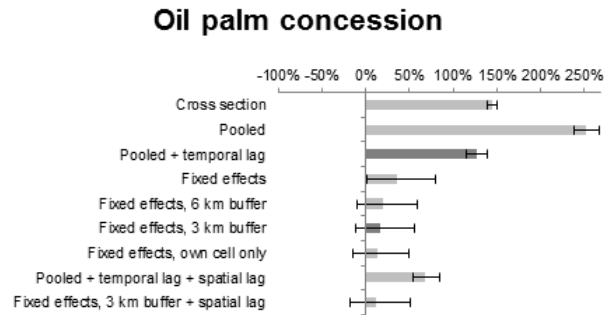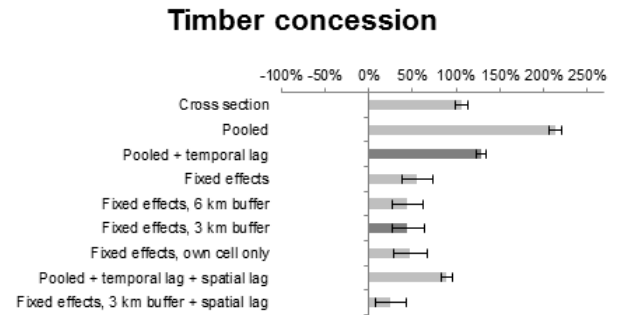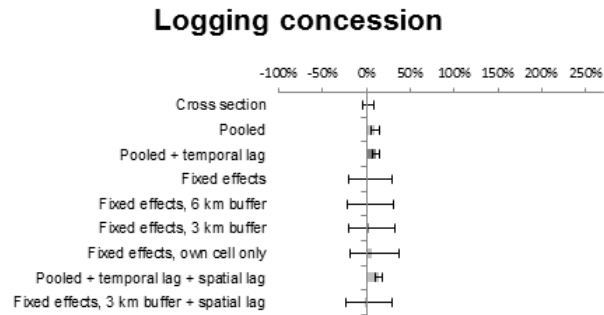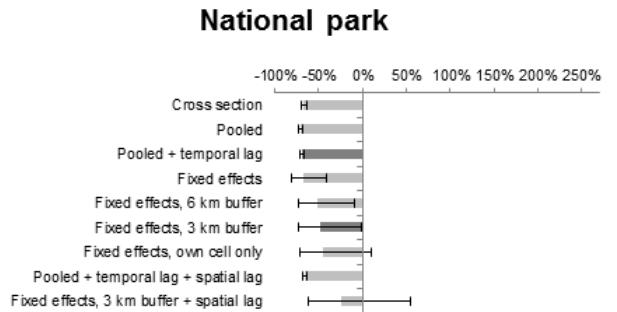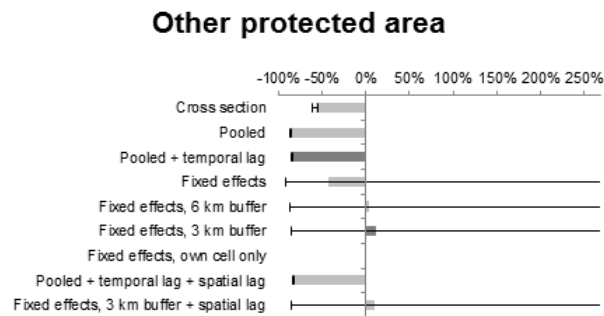

121

122 Figure S2. Change in deforestation rate due to land-use designation, by specification. Shaded bars represent  
 123 upper and lower bounds of estimated treatment effects.

124

125

126

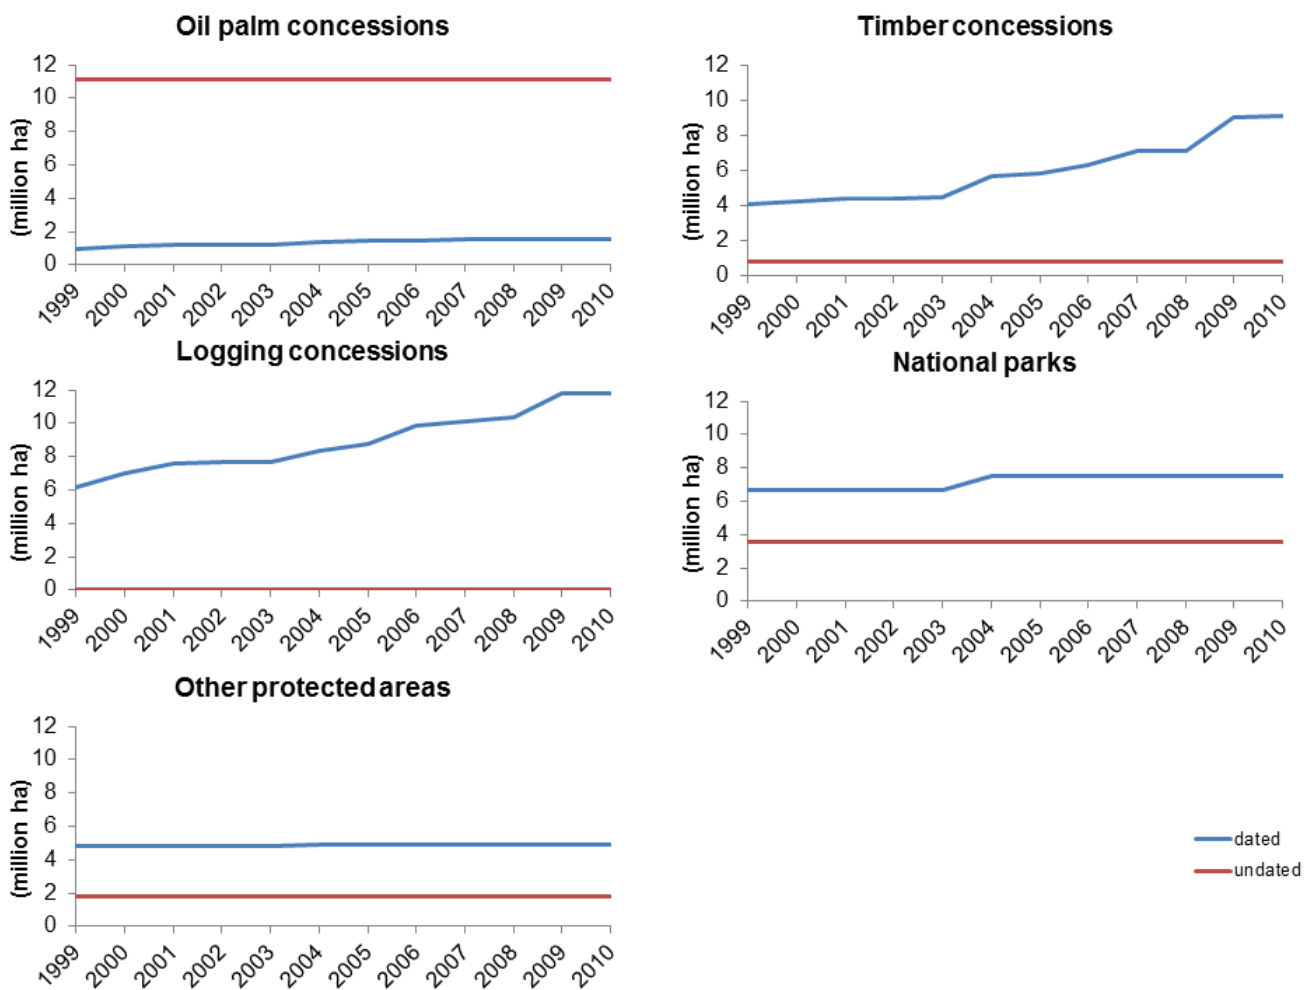

128

129 Figure S3. Growth in land-use designations across Indonesia, 1999-2010.

130

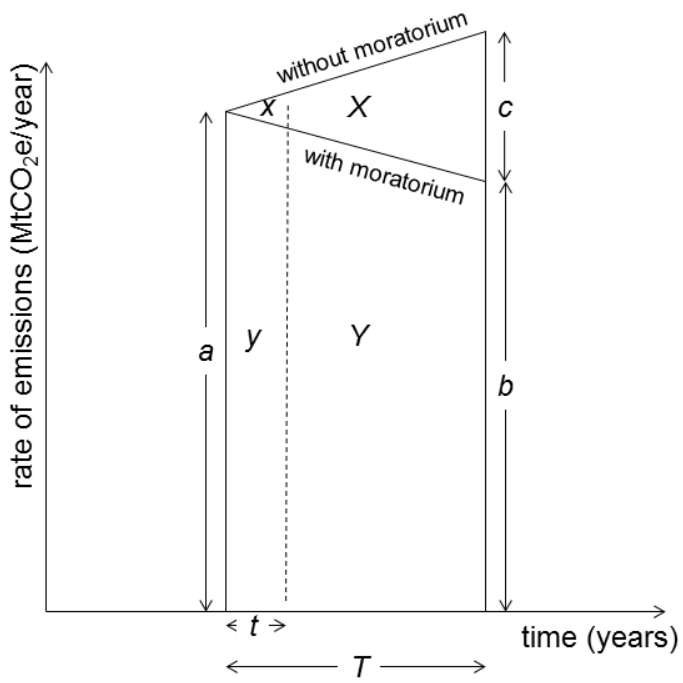

131

132 Figure S4. Trends in emissions with and without moratorium policy.
